Submitted as an investigation to *Genetics*

**Extensive horizontal exchange of transposable elements in the *Drosophila pseudoobscura* group**

Tom Hill<sup>1\*</sup> & Andrea J. Betancourt<sup>2</sup>

\*Corresponding Author

1. 4055 Haworth Hall, The Department of Molecular Biosciences, University of Kansas, 1200 Sunnyside Avenue, Lawrence, KS 66045.

2. Institute of Integrative Biology, University of Liverpool, Liverpool, United Kingdom

## 1 **Abstract**

2 While the horizontal transfer of a parasitic element can be a potentially catastrophic, it is  
3 increasingly recognized as a common occurrence. The horizontal exchange, or lack of  
4 exchange, of TE content between species results in different levels of divergence  
5 among a species group in the mobile component of their genomes. Here, we examine  
6 differences in the TE content of the *Drosophila pseudoobscura* species group. We  
7 identify several putative horizontal transfer events, and examine the role that horizontal  
8 transfer plays in the spread of TE families to new species and the homogenization of TE  
9 content in these species. Despite rampant exchange of TE families between species,  
10 we find that both TE content differs hugely across the group, likely due to differing  
11 activity of each TE family and differing suppression of TEs due to divergence in Y  
12 chromosome size, and its resulting effects of TE regulation. Overall, we show that TE  
13 content is highly dynamic in this species group, and that it plays a large role in shaping  
14 the differences seen between species.

15

16

## 17 **Data availability**

18 All data used in this study (summarized in table S1) is freely available online through the  
19 NCBI short read archive (NCBI SRA: ERR127385, SRR330416, SRR330418,  
20 SRR1925723, SRR330426, SRR330420, SRR330423, SRR617430-74). All genomes  
21 used are either available through Flybase.org or Popoolation.at.

## 22 Introduction

23 Unlike mammals, which have few active transposable elements (TEs) mostly fixed  
24 insertions within species (Hellen and Brookfield 2013a; b), transposable elements (TEs)  
25 in *Drosophila* species appear to be highly active, as inferred from a high proportion of  
26 polymorphic, and thus presumably recent, insertions (Charlesworth and Langley 1989;  
27 Sniegowski and Charlesworth 1994; Charlesworth *et al.* 1997; González *et al.* 2008;  
28 Petrov *et al.* 2011). The dynamic nature of TEs in *Drosophila* is reflected in the data  
29 from the 12-genomes project (Clark *et al.* 2007). While species in the genus all host  
30 LTR, non-LTR retrotransposons and TIR DNA transposons in roughly the same rank  
31 order of abundance (Sessegolo *et al.* 2016), the contribution of each appears to differ  
32 for different genomes. The proportion of total TE content that is non-LTRs, for example,  
33 ranges from ~12% to ~35% (Clark *et al.* 2007; Sessegolo *et al.* 2016).

34 Under a model of TE evolution where active transposition is followed by  
35 suppression and eventually, inactive decayed elements, one might expect that the  
36 active families of elements would differ between the species (Kaplan *et al.* 1985;  
37 Maruyama and Hartl 1991; Capy *et al.* 1992; Lohe *et al.* 1995; Hartl *et al.* 1997).  
38 Instead, the overall content is largely similar (Vieira *et al.* 1999; Lerat *et al.* 2011; Kofler  
39 *et al.* 2015b), with many of the same TE insertions found at low frequencies in both  
40 species (Kofler *et al.* 2015b). The reason might be that the overall TE content between  
41 species be regularly homogenized by horizontal exchange between the species  
42 (Bartolomé *et al.* 2009). This process is exemplified by the recent horizontal transfer of  
43 the P-element, newly acquired by *D. melanogaster* sometime in the 20<sup>th</sup> century from a  
44 Caribbean species, into *D. simulans* (Kofler *et al.* 2015a; Hill *et al.* 2016).

45 Here, we investigate these questions in a different *Drosophila* group, the  
46 *pseudoobscura* group, using publicly available genome sequences for five species, and  
47 an improved genome sequence from *D. pseudoobscura* (Richards *et al.* 2005), and  
48 several sequenced third chromosome isolates (Fuller *et al.* 2016). Unlike *D. simulans*  
49 and *D. melanogaster*, these species are not cosmopolitan and thus may have had less  
50 opportunity to encounter new transposable elements outside their ancestral range.  
51 Further, in contrast to most *Drosophila*, some species in this group were reported to  
52 have mostly fixed insertions; we re-examine this claim with new data. We also examine

53 horizontal exchange between species within the group and from outside the group, and  
54 find abundant evidence of recurrent horizontal exchange.

55

## 56 **Materials and Methods**

### 57 *Sequence data*

58 All sequence data used is summarized in Table S1. We used publicly available  
59 reference genomes for five species: *D. pseudoobscura* (NCBI: PRJNA18793), *D.*  
60 *persimilis* (NCBI: PRJNA29989 genome assembled from Sanger sequence reads,  
61 [http://popoolation.at/persimilis\\_genome/](http://popoolation.at/persimilis_genome/) for the genome based on illumina reads), *D.*  
62 *affinis* (NCBI: ERX103526), *D. lowei* ([http://popoolation.at/lowei\\_genome/](http://popoolation.at/lowei_genome/); Palmieri et  
63 al. 2014), *D. miranda* (NCBI: PRJNA77213) and *D. affinis*  
64 ([http://popoolation.at/affinis\\_genome/](http://popoolation.at/affinis_genome/)). We also used publicly available paired-end  
65 illumina data from inbred lines for four of these species [*D. persimilis* (SRA:  
66 SRR330426), *D. miranda* (SRA: SRR1925723), *D. lowei* (SRA: SRR330416 and  
67 SRR330418) and *D. affinis* (ENA: ERR127385)]. As we were unable to find publicly  
68 available paired-end illumina data for *D. pseudoobscura*, we used a data generated  
69 from an individual wild *D. pseudoobscura* made homozygous for the reference third  
70 chromosome inversion type (SRA: SRR617430, S. Schaeffer, pers. Comm.; Fuller et al.  
71 2016). As a result, only the third chromosome represents a wild chromosome, the rest  
72 of the genome is a mosaic of material from the wild and from the two different balancer  
73 stocks used, due to this we limited any population statistical analysis to the third  
74 chromosome.

75

### 76 *De novo annotation of transposable elements in the D. pseudoobscura group*

77 We annotated TE families in all five species, as well as putative TE sequences in the  
78 more diverged species (such as *D. lowei* and *D. affinis*), and compared our *de novo*  
79 annotations to the previous annotations for *D. pseudoobscura* and *D. persimilis*. These  
80 sequences were identified using *RepeatModeler* and *LTRHarvest* (Ellinghaus *et al.*  
81 2008; Smit and Hubley 2008) and filtered, as outlined in Supplementary Figure 1 to give  
82 us a set of 'high confidence' TE annotations.

83 To *de novo* annotate the transposable elements, as shown in Figure S1:

- 84 1. We recovered a set of TE candidates for each species using the reference genomes.  
85 We used two separate pipelines: (i) *Repeatscout* and *PILER* in the *RepeatModeler*  
86 pipeline (default parameters) (Price *et al.* 2005; Smit and Hubley 2008), with all  
87 sequences designated as microsatellites and simple repeats removed from the  
88 output, and (ii) *LTRHarvest*, which finds LTR retrotransposons (using parameters  
89 recommended in the *LTRHarvest* manual: `-tis -suf -lcp -des -sds -dna; -seed 100 -`  
90 `minlenltr 100 -maxlenltr 1000 -mindistltr 1000 -maxdistltr 15000 -xdrop 5 -mat 2 -mis`  
91 `-2 -ins -3 -del -3 -similar 90.0 -overlaps best -mintsd 5 -maxtsd 20 -motif tgca -`  
92 `motifmis 0 -vic 60 -longoutput`) (Ellinghaus *et al.* 2008). Though this step may bias us  
93 to find primarily LTRs, we note that most previously known TEs we find are LTRs,  
94 while most (19 of 41) novel elements are DNA transposons (Table S2).
- 95 2. Step 1 resulted in a set of 769 candidate TE sequences, ranging from 208bp to  
96 14.5kb. We used BLAST to filter and annotate the candidate TEs (parameters: e-  
97 value < 1e-08, `-word_size 10, -perc_identity 85`) (Altschul *et al.* 1990), by searching  
98 a database of all known *Repbase* and *Flybase* transposable element sequences for  
99 *Diptera* (including 121 TEs previously found in *D. pseudoobscura*, *D. persimilis* or *D.*  
100 *miranda*), with sequenced duplicated between the data bases removed using a  
101 custom python script.
  - 102 a. Sequences that show single BLAST hits (e-value  $\leq 1e-08$ ) to this data base  
103 were assumed to represent a previously identified TE family. We discarded  
104 these sequences and used the Repbase/Flybase TE sequence to represent  
105 the family instead. (349 sequences).
  - 106 b. From the remaining sequences, those that showed BLAST hits to several TE  
107 families, all from one superfamily, were considered to potentially represent a  
108 previously unidentified family within that superfamily. (180 sequences).
  - 109 c. Of the remaining sequences, those with hits all in a single order, but to  
110 multiple superfamilies, were potentially novel TEs within this order. (18  
111 sequences).
  - 112 d. For sequences which had no potential TE family assigned in Step 2 (222  
113 sequences), we attempted to find matches by aligning them to the online

114 NCBI non-redundant database using megablast. Of these, 202 had  
115 annotated or predicted genes as the primary BLAST hit; these were  
116 discarded. The remaining potentially novel TEs were retained (20  
117 sequences),

118 To facilitate downstream analysis, we obtained a single representative sequence for  
119 the potential novel TEs identified in Steps 2b, c and d, as is already done for those in  
120 Step 2a. To do this, we clustered sequences found for all species using *vmatch*  
121 (recommended *LTRHarvest* parameters: -dbcluster 95 7 -p -d -seedlength 50 -l 1101  
122 -exdrop 9) (Kurtz 2010). We confirmed these clusters by BLASTing novel TE  
123 sequences to themselves and grouping them by similar matches (parameters: e-  
124 value < 0.00001, -word\_size 10).

125 4. As these may only represent partial TE sequences, we further assembled the  
126 grouped sequences using *Trinity* (default parameters) to collapse similar  
127 sequences and get a representative sequence for the cluster, even if only a  
128 fragment of the consensus sequence (Haas *et al.* 2013). We checked these  
129 assemblies and clusters by aligning sequences from the cluster and with the  
130 *Trinity* assembly (if applicable) using *MAFFT* (parameters: --thread 3 --threadit 0 -  
131 -reorder --leavegappyregion --auto) (Katoh *et al.* 2002), to ensure that the  
132 assembly or longest sequence representing the putative novel TE was  
133 recovered. From each cluster of similar sequences, we took the longest  
134 sequence as the representative fragment of each putatively novel family.

135 5. Some of the putatively novel families identified in 2b may instead be divergent  
136 representatives of known families. To see whether this was the case, we again  
137 attempted to identify previously known families among them using the consensus  
138 sequences from the five species genomes. We aligned novel TEs pairwise to all  
139 *Repbase* TEs using *MAFFT* (parameters: --thread 3 --threadit 0 --reorder --  
140 leavegappyregion --auto) and used a custom *python* script to find the number of  
141 diverged aligned bases. We defined sequences as belonging to a known family if  
142 they were >90% similar to a known family across the sequence, following  
143 (Kohany *et al.* 2006). Two families of the novel sequences were found to belong  
144 to known families in this way (an I-element and a Jockey element), but were

145 closely related to insertions in distant relatives of the *obscura* group (*I-4\_DF* from  
146 *D. funebris* and *Jockey-8\_DRh* from *D. rhopaloa*, respectively). We therefore  
147 retained these sequences in our data set, as they likely represent diverged  
148 copies of these families, or ancient horizontal acquisitions.

149 6. From Steps 1-5, we found 567 candidate TE sequences, 349 of which belong to  
150 previously described TE families, including all 121 families previously found in the  
151 *D. pseudoobscura* group ('known' families), and 445 others (putative 'novel'  
152 families). We proceeded to filter sequences from this set which were represented  
153 by very few or very short matches to the reference genomes.

154 a. First, we used the 567 sequences to repeat mask the reference genome  
155 of each species using *RepeatMasker* (parameters: `-no_is -norna -`  
156 `no_low -gff -gccalc -u -s -cutoff 200`) (Tarailo-Graovac and Chen 2009),  
157 following recommendations in (Kofler *et al.* 2012). We required that the  
158 families have at least 25 Repeatmasker hits in at least one species (237  
159 sequences retained, 116 known and 121 novel families).

160 b. We then estimated the copy number of each TE family for each species  
161 from the Illumina short read data from adult females, discarding those  
162 estimated to have a median coverage less than 2-fold that of the third  
163 chromosome for less than 80% of the length of the sequence. To do this,  
164 we mapped short reads to the repeated masked reference genome and  
165 the 237 TE sequences retained from the previous step using BWA MEM  
166 (parameters: `paired end -t 5 -M`) (Li and Durbin 2009), and estimated  
167 coverage with *bedtools genomecov* (Quinlan and Hall 2010). Due to the  
168 poor assembly of the *D. persimilis* genome, we used a reference  
169 consisting of the *D. pseudoobscura* genome and the *D. persimilis* TE  
170 sequences. (157 sequences retained, from 116 known and 41 families  
171 novel to this species group).

172 We considered these 157 sequences to be a cromulent representation of the TE  
173 content in the *pseudoobscura* group, though we recognize that we may have  
174 discarded some true TE sequences.



175 Using this method, we found strong support for 114 of the 121 TE families  
176 previously described in *D. pseudoobscura*, *D. persimilis* or *D. miranda* and 2 TEs  
177 previously identified in other species. We also found 41 novel sequences,  
178 including two subfamilies of previously known sequences, 30 newly assembled  
179 sequences which BLAST exclusively to one super family, and nine potentially  
180 new families that BLAST to one TE order. We also found 15 sequences that  
181 cannot be assigned an order (either due to BLAST hits to multiple orders, or no  
182 BLAST hits). These 15 sequences passed all filters, including being found  
183 multiple times in species genomes and did not correspond to genes or other  
184 NCBI sequences in a universal BLAST search. To avoid unreliable inferences, we  
185 discarded these sequences from downstream analyses, but gave each of the 41  
186 novel sequences an ID (Table S2), and included them in masking and mapping  
187 stages. Sequences are available in File S1.

#### 188 *Estimating TE density in the reference genome.*

189 We used *RepeatMasker* v. 4.0.6 to mask each reference genome using the 157  
190 consensus TE sequences and 15 unknown sequences from the *de novo* annotation,  
191 (parameters: `-no_is -norna -nolow -gff -gccalc -u -s -cutoff 200`) (Tarailo-Graovac  
192 and Chen 2009). To estimate TE density, we used the density of TE bases per 1MB  
193 sliding window (with a step size of 100kb) of the *D. pseudoobscura* reference genome  
194 (after removing all N bases [e.g. TE bases / [window size – Ns in chromosome]]),  
195 across both assembled scaffolds and unassembled contigs from the reference genome.

#### 196 *Identifying insertions in reference genomes and in sequenced third chromosome lines of* 197 *D. pseudoobscura*

198 To identify insertion sites in the reference genomes of *D. pseudoobscura* and *D.*  
199 *persimilis*, we used the *PopoolationTE2* pipeline (Kofler *et al.* 2016a). Briefly, we used  
200 *RepeatMasker* v. 4.0.6 to mask the *pseudoobscura* genome using the 157 consensus  
201 TE sequences and 15 unknown sequences identified above (parameters: `-no_is -norna`  
202 `-nolow -gff -gccalc -u -s -cutoff 200`) (Tarailo-Graovac and Chen 2009). We chose to  
203 use the *D. pseudoobscura* reference, rather than the fragmented *D. persimilis*  
204 reference, as it facilitated mapping reads to genomic insertion sites. We expect similar



205 results as these species are closely related (0.018 average synonymous divergence  
206 (Noor *et al.* 2007)), and we find that similar numbers of reads map to TEs regardless of  
207 whether the *D. pseudoobscura* or *D. persimilis* genome is used (27.63% vs 27.27%).

208 We then mapped available Illumina reads to the repeat masked reference, the  
209 consensus TE sequences, and to sequences matching these consensus TEs identified  
210 by *RepeatMasker* using BWA-MEM (parameters: paired end -t 5 -M, with secondary  
211 alignments reported, but marked) (Li and Durbin 2009). Using masked TE sequences  
212 to aids mapping of degenerate TE sequences, as described in (Kofler *et al.* 2016a).

213 Following mapping, we generated a pileup file summarizing identities and locations of  
214 TE insertions for all lines in *PopoolationTE2* (default settings, --map-qual 10) and  
215 subsampled to a physical coverage of 25, removing secondary alignments. As these  
216 sequences are mostly from inbred lines, we required the estimated frequency to be at  
217 least 50% (default parameters, --target-coverage 25, --min-count 5, minimum frequency  
218 = 0.5) (Kofler *et al.* 2016a). We then identified the number of insertions per MB window  
219 (after adjusting for the number of N bases in the window [e.g. TE number / [window size  
220 – Ns in window]]) across the genome of each species.

221 *Expression confirmation of putative TE sequences.*

222 We also used expression data for mRNA (SRA: SRR1956914, taken from (Duff  
223 *et al.* 2015)) and small RNAs (SRA: SRR032435, taken from (Leslie *et al.* 2010)) from  
224 the *D. pseudoobscura* reference line (MV-25) to examine the expression of novel TEs.

225 Before further analysis, we trimmed all genomic and RNAseq Illumina reads used  
226 with *Sickle* to remove low quality sequence data (default parameters for long reads,  
227 minimum length = 16 for small RNAs), and removed reads that were unpaired (apart  
228 from the small RNA reads) after this step from the sequence data (Joshi and Fass  
229 2011).

230 We mapped small RNA sequences from *D. pseudoobscura* to known and novel  
231 TEs identified in that species, using publicly available small RNA reads from the  
232 reference strain ((Leslie *et al.* 2010), SRA: SRR032435).

233 We first removed non-TE related small RNAs, following (Aravin *et al.* 2007;  
234 Rahman *et al.* 2015), by mapping to a database of known *Drosophila* viruses and small  
235 RNAs other than those that are TE-related, including miRNAs, viral siRNAs, snoRNA  
236 (Rahman *et al.* 2015), using *BWA aln* and allowing for up to 3 mismatches (parameters:  
237 -n 3) (Aravin *et al.* 2007; Li and Durbin 2009). We then mapped the remaining reads to  
238 the repeat masked *D. pseudoobscura* reference genome and the novel and known TE  
239 sequences identified in this study (*BWA aln* parameters: -n 3, maximum 2 alignments).

240 We classified small RNAs by length and orientation using a custom python script  
241 and the *Pysam* python library, following (Brennecke *et al.* 2008). Specifically, we  
242 considered small RNAs from 21 to 23 to be siRNAs and from 24 to 29 to be piRNAs  
243 (Obbard *et al.* 2009). We used *bedtools* (*intersect*, -wa -wb -f 0.3 -r), to check for a  
244 10-bp overlap between sense and anti-sense matches and used *sequence logos*  
245 (Schneider and Stephens 1990) to check for the 1-T, 10-A bias, both associated with  
246 ping-pong amplification, a characteristic feature of piRNAs (Levine and Malik 2011).

#### 247 *Detecting short range horizontal transfer events within the pseudoobscura group*

248 To detect horizontal transfer of TEs within the five species examined, we compared  
249 divergence between consensus TE sequences to genomic divergence, following the  
250 rationale described in (Bartolomé *et al.* 2009). We limited this analysis to families found  
251 in at least 3 species and with an annotation on Repbase.

252 To construct consensus TE sequences for each TE family and each species, we  
253 identified the major allele for each species at each variable site using *GATK v3.5-0-  
254 g36282e4 HaplotypeCaller*, with ploidy levels set to the estimated copy numbers based  
255 on coverage of the TE sequence, and using *FastaAlternateReferenceMaker* (default  
256 parameters) to generate fasta sequences from the mapped data (DePristo *et al.* 2011).

257 We aligned these consensus sequences from each species using *MAFFT* (parameters:  
258 --thread 3 --threadit 0 --reorder --leavegappyregion -auto) (Katoh *et al.* 2002) and  
259 generated a phylogeny of each sequence using the *Repbase* annotation and *PhyML*  
260 (parameters: -M GTR) (Guindon *et al.* 2010). We obtained a total of 39 annotated  
261 alignments that included sequences for *D. affinis* comparisons, and 62 additional  
262 sequences for all other species comparisons (noted in Table S2).

263 We estimated synonymous site divergence ( $d_S$ ) in the TE sequences pairwise  
264 between species using *codeml* (with transition–transversion rates estimated from the  
265 data, and codon frequencies from the nucleotide frequencies) and the coding regions  
266 for these TEs as annotated in *Repbase* (Kohany *et al.* 2006; Yang 2007). We then  
267 compared  $d_S$  of TEs to that of orthologous genes between species obtained in the same  
268 way, taken from Avila *et al.* (2014). Following Bartolomé *et al.* (2009), we considered an  
269 individual family to show strong evidence of exchange if its  $d_S$  value was below the  
270 2.5% quantile of the  $d_S$  of all nuclear genes, to have potentially transferred if  $d_S$  was  
271 between the 2.5% and 50% quantiles, and to show no evidence of transferring if above  
272 the 50% quantile.

273 We also examined polymorphism within TE families for evidence of horizontal  
274 transfer. We estimated Tajima's  $D$  of each TE using *Popoolation* (Kofler *et al.* 2011), with  
275 the TE copy number as the sample size. As negative Tajima's  $D$  may reflect recent  
276 expansion of a TE family (Bartolomé *et al.* 2009). We compared the levels of  
277 polymorphism shared among TEs in each species between potentially transferred TEs  
278 ( $d_S < 2.5\%$  quantile) and TEs that are unlikely to have transferred ( $d_S > 50\%$  quantile).

### 279 *Detecting long range horizontal transfer events with other Drosophila species*

280 We attempt to identify long range transfers from other *Drosophila* species. To do this,  
281 we separated all known *Drosophila* TEs by their super families, including our set of *D.*  
282 *pseudoobscura* group TEs, and aligned the TE sequences within each superfamily  
283 using *MAFFT* (Kato *et al.* 2002) and generated phylogenies for these using *PhyML*  
284 (Guindon *et al.* 2010). We then extracted patristic distance matrices for each  
285 superfamily using *Patristic* (Fourmant and Gibbs 2006) and compared each distance to  
286 the nuclear genome comparison performed previously for these genomes (Chen *et al.*  
287 2014).

288

## 289 **Results and Discussion**

### 290 *Transposable element annotation of the D. pseudoobscura group genomes*

291 We identified insertions of the 157 well-supported TE families in the reference genome  
292 of the five species, and assessed their TE content using four metrics: the proportion of

293 the reference genome masked (using *RepeatMasker* (Tarailo-Graovac and Chen  
294 2009)), the proportion of short reads mapping to each TE sequences, the number of  
295 insertions in each genome using short read data (using *PopoolationTE2* (Kofler *et al.*  
296 2016b), demonstrated across genomes in Supplementary Figure 2) and the estimated  
297 copy number of each TE family (Table 1 and Table S2). We also estimated the density  
298 of TE content across the genome (in masked bp/Mbp) using the proportion of the  
299 reference masked by *Repeatmasker*.

300 Across all species, for all measures of TE content we find a significant linear  
301 correlation between measures (Table S2, Spearman's Rank Correlation  $p$ -value <  
302 0.00213), though the strength of the correlation is weak for all species between the  
303 proportion of the genome masked at the family level versus the copy number of the TE  
304 family, and the insertion count versus the proportion of the genome masked ( $\rho < 0.58$ ),  
305 suggesting that the proportion of the genome masked may be an inconsistent measure  
306 of TE density. As expected, correlations between measures of TE content in the  
307 species with genomes assembled only from short reads are lower (Table 1, Table S2)  
308 (Hoen *et al.* 2015; Rius *et al.* 2016), and the estimates of TE content for these species  
309 are likely more unreliable. We therefore limit our analysis of TE content to the two  
310 genomes with available long read data, *D. pseudoobscura* and *D. persimilis*. We also  
311 identified 15 sequences that pass all filters, but cannot be assigned to a TE order, we  
312 have included these sequences and their statistics, but have not included these  
313 sequences in further analyses (e.g. the 2 unknown sequences in *D. pseudoobscura*,  
314 Table 1, Table S2).

315 Because the *D. pseudoobscura* and *D. persimilis* genomes were originally  
316 assembled from long reads (and the *D. pseudoobscura* genome has also been  
317 assembled with the help of PacBio information and Sanger sequence information)  
318 (Richards *et al.* 2005; Clark *et al.* 2007), the TE content of these two species is already  
319 well-annotated. We found 116 previously identified *pseudoobscura* TE families using our  
320 pipeline. We also found two TE families from other species, and 28 additional putative  
321 TE families that passed all our filters in these two species. For *D. pseudoobscura*, we  
322 were able to use RNAseq data from (Duff *et al.* 2015) to determine whether these  
323 elements showed evidence of expression in embryos, using publically available

324 expression data. We estimated RPKM for both novel and known TEs from these data;  
325 of the novel TEs, nine had appreciable levels of expression (Figure S3, FPKM > 1), a  
326 similar proportion to that of the known TEs (49 of 116). Similarly, we used sequences  
327 from embryonic small RNAs to ask if suppressive small RNAs are produced against  
328 these TE families. We extracted TEs with at least 20 small RNAs mapping to them,  
329 which comprised 114 of the 116 known TEs and all 28 of the novel TE sequences (Table  
330 S7 & 8). Most of these elements (108 of 140) had piRNAs generated against them  
331 (using the 24-29nt range generally used to identify piRNAs in other species (Ghildyal  
332 and Zamore 2009), and 27 elements also had homologous siRNAs (21-23nt small  
333 RNAs) (Figure S3, Table S2) (Obbard *et al.* 2009). A subset of the piRNAs, those  
334 produced in the germline (Aravin *et al.* 2007), are expected to show signatures of “ping-  
335 pong” amplification— small RNAs that match both sense and anti-sense strands of the  
336 TE sequence, an enrichment of these that show a 10bp overlap, a uracil in position 1 of  
337 sense strand piRNAs, and adenosine in position 10 of the antisense small RNAs)  
338 (Aravin *et al.* 2007). We found that 60 elements (53 known families and 7 novel; 36  
339 LTRs, 15 LINEs, 7 DNA transposons & 2 helitrons) showed signatures of ping-pong  
340 amplification— from inspecting *Sequence Logos* plots (Table S2) (Schneider and  
341 Stephens 1990); novel and known elements showed ping-pong small RNAs at similar  
342 rates (Figure S3, Mann-Whitney U test  $W = 24$ ,  $p > 0.1676$ ). As these TE sequences  
343 are all multicopy, these measures of expression are mainly useful to show that the  
344 putative novel TEs have characteristics like those of the known TE sequences (Mann-  
345 Whitney U test  $W = 37$ ,  $p > 0.05$ , Figure S3).

346 In all, we found 12.33% and 23.59% make up the reference genomes of these  
347 species, (Table 1). In contrast to a previous study, which found similar proportions of  
348 LTRs and LINEs in the *D. pseudoobscura* genome (Clark *et al.* 2007), we find over  
349 twice as much TE content due to LTR vs. LINE retrotransposons (Table 1); it is worth  
350 noting an additional effort was put into finding novel LTRs in the putative TE set using  
351 *LTRHarvest* (Ellinghaus *et al.* 2008).

352 In the remaining species, we find 20 additional families not found in *D.*  
353 *pseudoobscura* and *D. persimilis* (Figure 1B). The 57 TE families shared among all five  
354 species constitute most of the TE content (73-84% of insertions and 53-78% of each

355 species reference TE content, Table S2), but vary in copy number between species (e.g.  
356 HelitronN-1 in *D. miranda* and *D. lowei*, Table S2), possibly due to stochastic expansion  
357 and loss of families over time. For example, we find *HelitronN-1\_DPe* has 1927  
358 insertions and makes up 1.1% of the genome of *D. miranda*, while it has only 727  
359 insertions in *D. lowei*, comprising of 0.14% of the genome (Table 1, Table S2). This is  
360 likely due to the collapsing of *Helitron-1* and the closely related ISX sequence that has  
361 been co-opted for dosage compensation in *D. miranda* (Ellison and Bachtrog 2013).  
362 These differences can be further seen in the distributions of copy numbers in families,  
363 which differ between species (Figure S3, S4).

364 While we annotate the *D. miranda*, *D. lowei* and *D. affinis* genomes using a  
365 pipeline identical to that for other species, we suspect we have underestimated the TE  
366 content of these species. There are three main reasons. First, the genome assemblies  
367 for these species rely on short reads (Palmieri *et al.* 2014), which can lead to under-  
368 representation of the TE content of the genome (Rius *et al.* 2016). Similarly, previous  
369 estimates of the TE content of *D. pseudoobscura* and *D. persimilis* were much lower  
370 likely due to more fragmented genomes (Clark *et al.* 2007). Second, we may have  
371 missed TE families unique to these species, or may have recovered them only as  
372 fragments, as it is easier to recover full-length TE sequences if they closely match  
373 sequences already in RepBase as is true for the *D. persimilis* and *D. pseudoobscura*  
374 sequences. Finally, and likely the most important reason, the material sequenced for the  
375 reference genomes for *D. lowei*, *D. miranda* and *D. affinis* was adult females and not  
376 mixed sex embryos as for the others (Richards *et al.* 2005; Clark *et al.* 2007). Thus the  
377 other genomes contain the TE-rich Y-chromosome, which appears to be cytologically  
378 quite large in these species (Dobzhansky 1935, 1937), and may shows less under-  
379 replication of the TE-rich heterochromatin than adult samples.

380 In *D. persimilis* we found the same TE families as in *D. pseudoobscura*, but  
381 estimated 23.59% of the *D. persimilis* reference to be repetitive content versus 12.33%  
382 in *D. pseudoobscura*, implying 21.3MB more repetitive content in the *D. persimilis*  
383 reference genome compared to *D. pseudoobscura*. Previous annotation from the 12-  
384 genomes project found lower TE content as a proportion of the genome than that found  
385 here (3% and 8% vs. 12.33% and 23.59% here), but a similar ~2-fold enrichment in TEs



386 for *D. persimilis* (Clark *et al.* 2007). While it is true that *D. persimilis* has a larger  
387 genome than *D. pseudoobscura* ((Gregory 2005), the two species genomes are  
388 estimated to differ only by ~2Mb (Bosco *et al.* 2007; Gregory and Johnston 2008).

389 The higher TE content of *D. persimilis* is not due to the presence of additional  
390 families, as the same families occur in both species (Table 1, Figure 1). In fact, as  
391 these species hybridize occasionally (Noor *et al.* 2007), it would be surprising if their TE  
392 families remained very distinct. Estimates of copy number from coverage of short read  
393 data (collected from adult females in both species) shows more copies of each TE  
394 family in *D. persimilis* than *D. pseudoobscura* (46.8 vs. 39.6 on average), but the  
395 difference is highly non-significant (Mann-Whitney U,  $p = 0.669$ ).

396 Simple coverage differences of TEs, could, in principle, be explained by  
397 differences in under-replication of TE between the strains or species. But this is  
398 unlikely, as the coverage differences are also consistent with genome-size estimates,  
399 insertion number recovered and the proportion of the genome repeat masked  
400 (significant associations between all, as stated previously). If the difference is genuine,  
401 it could be due to the differences seen in a few families with large numbers of insertions  
402 in *D. persimilis*, such as *Gypsy10\_Dpse*, *HelitronN-1\_Dpe*, *Gypsy17\_Dpse*, and  
403 *MiniME\_DP* (Table S2). Based on coverages of each TE sequence in each species, we  
404 estimate that *D. persimilis* has, at most, ~5Mb more TE content than *D. pseudoobscura*,  
405 consistent with the minor differences in genome size found between the two species  
406 (Bosco *et al.* 2007), suggesting a large amount of genomic content is missing from the  
407 *D. pseudoobscura* reference genome.

408 It is possible that an accumulation of TEs in the fixed inversions between  
409 *D.pseudoobscura* and *D. persimilis* could explain the large difference in TE content, due  
410 to the reduced genomic exchange in these regions (Machado *et al.* 2007), allowing  
411 insertions to accumulate in one species but not the other. Consistent with this idea, we  
412 find that LTR retrotransposons are at significantly higher densities of TE insertions  
413 within these inverted regions in *D. persimilis* when compared to *D. pseudoobscura* and  
414 the uninverted regions (File S2, Insertions per MB, using inversion windows defined in  
415 (Avila *et al.* 2014); Mann Whitney U test: LTR inside inversions  $W = 53686$ ,  $p = 5.674e-$   
416  $05$ , LTR near inversions  $W = 16604$ ,  $p$ -value =  $0.1128$  LTR outside inversions  $W =$



417 290520, p-value = 0.1407). However, we find RC and LINE insertions are at significantly  
418 higher densities in *D. persimilis* regardless of genomic location (Insertions per MB,  
419 Mann Whitney U test:  $W > 335780$ , p-value  $< 0.0001303$  for inside, outside and near  
420 inverted regions) and no difference in TIRs ( $W < 790$ , p-value  $> 0.37$ ), suggesting that  
421 the fixed inversions are not the only explanation.

422 One final possibility, the Y chromosome of these species may also play a role in  
423 both the genome size and TE content differences of the species. While considerable  
424 variation exists in the size of *D. pseudoobscura* Y chromosome size across types  
425 (Dobzhansky 1935, 1937), the *D. persimilis* Y chromosomes are limited to the largest of  
426 these types (Types I, II and III). As the *D. pseudoobscura* reference genome was likely  
427 generated from a strain containing the smallest Y chromosome type  
428 (Standard/Arrowhead, likely type V) (Dobzhansky 1937; Dobzhansky and Sturtevant  
429 1937), while the *D. persimilis* genome strain used to generate their genome likely  
430 contains the most common *D. persimilis* Y, the largest of the chromosome types  
431 (Dobzhansky 1937). Previous work has also found Y-linked variation in *D. melanogaster*  
432 and *D. simulans* to be associated with phenotypic variation in a number of factors  
433 including TE regulation, it is possible that a larger Y can cause poorer TE regulation,  
434 due to the increased heterochromatin load in the genome (Sackton and Hartl 2013;  
435 Francisco and Lemos 2014). This is possibly the case between *D. pseudoobscura* and  
436 *D. persimilis*, where the larger Y chromosome may have led to the poorer regulation of  
437 TE families, leading to the ~5Mb expansion of TEs in *D. persimilis*.

438

439 *Several transposable element families show evidence of ancient horizontal spread*  
440 *between species*

441 As a majority of TEs are likely acquired in a species by horizontal transfer by closely  
442 related species (Burt and Trivers 2006; Peccoud *et al.* 2017). We examined our set of  
443 TEs for evidence that they had been horizontally acquired from another *Drosophila*  
444 species by comparing the patristic distance of all *Repbase* TEs pairwise to the average  
445 patristic distance of *pseudoobscura* group TEs (Kohany *et al.* 2006), after building a  
446 phylogeny of each superfamily (Supplementary Figure 3).

447           Across 4096 pairwise comparisons, we found 230 where the TE patristic distance  
448 was lower than the previously found genic distance (Table S7) (Chen *et al.* 2014).  
449 These events were limited to 63 of 157 TEs, with most these TEs having lower patristic  
450 distances than entire species groups (such as the *D. rhopaloa/D.elegans/D.ficusphila*  
451 species subgroup), consistent with a transfer of the TE between the common ancestor  
452 of the species and the *D. pseudoobscura* group, followed by a diversification into  
453 multiple elements seen today. 42 of these transferred elements are LTRs, 6 are DNA  
454 transposons and 15 are LINEs (Table S7, Figure 2A). While a higher proportion of LTRs  
455 are transferred between species, each of these families only appears to have been  
456 exchanged with a single species, rather than multiple, likely because of the recent  
457 expansion of LTRs in *Drosophila*, compared to the more ancient expansion of most  
458 LINEs and DNA transposons (Figure 2B). Among these transferred elements, we find a  
459 *piggyBac* element that was acquired from *D. busckii*, several elements from the Asian  
460 subgroup of the *D. melanogaster* group, (such as *P\_226* with *D. elegans*, *Jockey\_185*  
461 with *D. rhopaloa* and *I\_149* with *D. ficusphila*) and several Jockey elements are closely  
462 related to elements found in the *Drosophila* clade species, such as with a *D. virilise*  
463 ancestor. We compared the proportion of TEs showing HT events between species to  
464 the patristic distance to each species, we find a significant negative linear correlation  
465 between the species genic patristic distance and the proportion of TEs (Figure 2C,  
466 Binomial GLM logistic regression, z-value = -7.88, p-value < 2e-16), agreeing with  
467 previous findings that horizontal acquisition is more likely between closely related  
468 species (Peccoud *et al.* 2017).

469

#### 470 *Evidence of recent recurrent horizontal transfer between species*

471           In the *D. melanogaster* group, in addition to occasional bouts of catastrophic  
472 invasion, many elements appear to have been transferred commonly between close  
473 relatives in the group (Daniels *et al.* 1990; Clark and Kidwell 1997; Bartolomé *et al.*  
474 2009). For *pseudoobscura* group TEs found in at least 3 species which had previously  
475 described coding regions (101 TEs, 39 for comparisons to *D. affinis*), we compared the  
476 silent site divergence ( $d_S$ ) of TEs found between species to the  $d_S$  of host genes.  
477 Overall, we found a significant reduction in synonymous divergence relative to host

478 genes for all comparisons (Mann-Witney U test  $p$ -value < 0.05), excluding those  
479 involving *D. affinis* (Figure 3A). We find 76 TE families below the 97.5% quantile of  
480 nuclear gene  $d_S$  in at least one comparison suggesting potentially recent transmission  
481 between species (51 of 62 LTRs, 19 of 30 LINEs and 6 of 8 DNA transposons).  
482 Inconsistent with horizontal transfer, there is not a depletion of non-LTR retrotransposon  
483 (LINE) elements found here.

484 We also compared the phylogenies of the TEs to that of the species, again  
485 looking for evidence of horizontal transfer. Of these families, 41 have phylogenies that  
486 differ from the species tree and group the two species with little divergence together. It  
487 is possible these differences are due to incomplete lineage sorting, or gene tree  
488 discordance, it is also possible that horizontal transfer has occurred for this family  
489 between these species, and so may support HT for 34 LTRs, 3 DNA transposons and 5  
490 LINEs (All of which are below the 97.5% quantile for genomic  $d_S$ , Figure 3B; Table S2).  
491 Again, we find no evidence of exchange with *D. affinis*. In the *D. pseudoobscura*  
492 subgroup each species can hybridize with others to some degree (though likely not  
493 occurring in nature; Machado et al. 2007), therefore, we cannot determine if these  
494 apparent transfer events are true horizontal events or vertical transfer via hybridisation.  
495 We do see slightly elevated proportions of TIRs & LTRs when comparing phylogenies,  
496 consistent with horizontal transfer as suggested previously in (Sánchez-Gracia *et al.*  
497 2005; Bartolomé *et al.* 2009). Conversely, we found  $d_S$  between species and *D. affinis*  
498 was significantly higher for TEs than host genes, consistent with the allopatric  
499 separation limiting HT events seen between species and possibly unconstrained  
500 evolution in the TEs (Figure 3A, Mann Whitney U test:  $p < 3.5e-08$ , Table S5).

501 By comparing Tajima's D for each TE in species we can look for strongly negative  
502 D, consistent with a copy number expansion following horizontal transmission  
503 (Bartolomé *et al.* 2009). All comparisons show equal levels of D in each species, close  
504 to 0, implying that each species already share the TE families, resulting in no expansion  
505 in copy number (Figure 3C). Consistent with this, we find all the TEs potentially shared  
506 between species have shared polymorphism (Figure 3E), which is not expected if  
507 acquisition is recent and purely horizontal. However, this result conflicts with our  
508 expectation from the nuclear  $d_S$  comparison, which we expect to be at similar levels to

509 TE  $d_S$  if there is hybridization. This result suggests pervasive transmission between  
510 species, resulting in polymorphism being exchanged between species several times,  
511 rather than once, resulting in no excess of low frequency polymorphism (Tajima 1989;  
512 Bartolomé *et al.* 2009). Alternatively, there is less constraint on polymorphism in  
513 transposable elements, allowing polymorphisms to drift to higher frequencies in shorter  
514 periods of time following their horizontal acquisition.

515 Interestingly, 10 TE families appear to transfer between species in all  
516 comparisons ( $d_S < 0.25\%$  quantile: 1 TIR, 1 LINE and 8 LTRs), while 21 show no  
517 evidence of transfer ( $d_S > 50\%$  quantile: 1 TIR, 1 helitron, 11 LINEs and 9 LTRs),  
518 suggesting that rates of transmission are highly dependent on the TE family and its  
519 activity. We also see large differences in copy numbers of each family in each species.  
520 We next looked to see if a lack of exchange can lead to changes in copy number of a  
521 family and explain the differences between *D. persimilis* and others.

522 We compared changes in copy number over all the species (via the coefficient of  
523 variation), for pervasively transferring TEs, non-transferring TEs and all other TEs. We  
524 find no difference in the coefficient of variation of copy number for pervasively  
525 transferring families and non-transferring families (Figure 3D; Mann Whitney U  $p$ -  
526 value  $> 0.19$  for all comparisons), suggesting that reduced transmission between  
527 species isn't altering dynamics of the families compared to pervasively transferring  
528 families. This low divergence and no evidence of family expansion has two possible  
529 explanations: 1. There may be gene flow to some degree between these species in the  
530 wild, while the genes are likely not introgressed due to incompatibilities or lower fitness,  
531 their linked TEs will be transpose more readily after hybridisation, becoming unlinked  
532 from this gene. This variant will then be maintained in the new host, resulting in reduced  
533 divergence for the TE family between the species. 2. Due to the sympatry of the  
534 *pseudoobscura* subgroup, there may have been recurrent horizontal transmission  
535 between species, for TE families already present in each of the species, resulting in the  
536 low  $d_S$ , but shared polymorphism and lack of copy number expansion. The lower  
537 numbers of LINE families found exchanging between species supports the idea of  
538 horizontal exchange, however the supposed numbers of exchanges (up to 61) between  
539 species is unprecedented, giving more support to vertical exchange of TEs. Despite this

540 pervasive TE exchange of some families, TE dynamics may be changing within the  
541 species, leading to the differences seen in TE families, densities and family copy  
542 numbers.

543

544 Like *D. melanogaster*, the *D. pseudoobscura* group shows highly active TEs that  
545 appear to be constantly undergoing a cycle of acquisition, expansion and high activity,  
546 suppression and finally extinction. Strangely, despite TE exchange between species, the  
547 group shows distinct differences in TE content and TE densities. Though some of these  
548 differences are due to differences in quality of assembly of each species genome and  
549 method used to identify TE insertions, we find a distinct expansion in TE numbers in *D.*  
550 *persimilis*. We find these differences are likely due to stochastic differences in  
551 expansion and extinction between shared families, and not due to differing activities in  
552 novel and private families compared to these shared families. Overall this suggests that  
553 despite frequent gene flow, TE dynamics can evolve rapidly due to stochastic factors  
554 across the lifetime of a family.

555 Due to the history of the first recorded instance of a horizontal transfer of a  
556 transposable element, we tend to think that these transfers are rare, likely catastrophic  
557 events. However, an expanding body of evidence suggests that these events are likely  
558 a common occurrence throughout genomes, becoming more and more common the  
559 more closely related two species are. This transfer of elements is possibly even  
560 recurrent in some cases and, due to closely related sequences already established  
561 within piRNA clusters, do not cause the fitness costs seen with the invasion of P-  
562 element into *D. melanogaster*. Our results support the idea that TEs are highly fluid,  
563 moving between genomes easily without leading to the expansion of TE content in a  
564 species genome, or heavy catastrophic events such as was seen in laboratories with  
565 the invasion of P-element.

## 566 **Acknowledgements**

567 Thanks to L. Endler and D. Gómez Sánchez for discussion and advice concerning the  
568 bioinformatic analysis. We are grateful for helpful discussion provided by K. Senti, R.  
569 Kofler, B. Charlesworth, A. Clark, R. Unckless and J. Blumenstiel. Thanks for S. W.

570 Schaeffer and M. Noor for providing the data used in this survey and advice concerning  
 571 how the data should be used. The sequencing the *D. pseudoobscura* line sequencing  
 572 was funded by a National Institute of Health (NIH) grant R01-GM098478 to S. W.  
 573 Schaeffer. Funding for TH was provided by the Max Kade foundation.

574

575 **Table 1:** Number of TE families and counts by order in species. % of reads mapping to  
 576 each order in each species, number of copies found based on coverage relative to  
 577 chromosome 3, % of the reference genome masked by each order for each species and  
 578 number of insertions found using PopoolationTE2 (Kofler *et al.* 2016a). As LTR  
 579 elements often exist not as complete insertions, but as solo-LTRs resulting from  
 580 illegitimate recombination, coverage for the LTR elements was estimated for both solo  
 581 LTRs and LTR bodies separately, with the average taken across the combined  
 582 sequences. We tested for extrachromosomal circular DNAs such as from Helitrons and  
 583 Polintons via comparisons between copy numbers and insertion numbers. We excluded  
 584 the unknown families from the total insertion counts.

|                                 |          | Reads      |         |          | Reference |
|---------------------------------|----------|------------|---------|----------|-----------|
|                                 |          | n families | % reads | est. num | % genome  |
| <b><i>D. pseudoobscura</i></b>  | TIR      | 31         | 1.745   | 414      | 0.98      |
|                                 | LTR      | 72         | 8.875   | 2230     | 7.21      |
|                                 | LINE     | 35         | 3.633   | 1121     | 2.85      |
|                                 | RC       | 3          | 1.852   | 978      | 1.21      |
|                                 | Polinton | 1          | 0.417   | 149      | 0.081     |
|                                 | Unknown  | 2          | 0.332   | 22       | 0.017     |
|                                 | Total *  | 142        | 16.522  | 4892     | 12.33     |
| Total<br>(including<br>Unknown) | 144      | 16.854     | 4914    | 12.5     |           |
| <b><i>D. persimilis</i></b>     | TIR      | 31         | 1.547   | 413      | 1.29      |
|                                 | LTR      | 72         | 14.273  | 2260     | 12.95     |
|                                 | LINE     | 35         | 6.956   | 1301     | 5.76      |
|                                 | RC       | 3          | 4.43    | 1781     | 3.41      |
|                                 | Polinton | 1          | 0.034   | 46       | 0.18      |

|                          |                                 |     |        |      |        |
|--------------------------|---------------------------------|-----|--------|------|--------|
|                          | Unknown                         | 2   | 0.543  | 76   | 0.025  |
|                          | Total *                         | 142 | 27.24  | 5801 | 23.59  |
|                          | Total<br>(including<br>Unknown) | 144 | 27.78  | 5877 | 23.615 |
| <hr/>                    |                                 |     |        |      |        |
| <b><i>D. miranda</i></b> | TIR                             | 31  | 0.892  | 262  | 0.87   |
|                          | LTR                             | 67  | 7.19   | 973  | 2.21   |
|                          | LINE                            | 36  | 5.367  | 1431 | 1.25   |
|                          | RC                              | 5   | 1.484  | 1934 | 1.16   |
|                          | Polinton                        | 1   | 0.054  | 9    | 0.024  |
|                          | Unknown                         | 2   | 0.337  | 4    | 0.015  |
|                          | Total *                         | 140 | 14.987 | 4609 | 5.51   |
|                          | Total<br>(including<br>Unknown) | 142 | 15.324 | 4613 | 5.525  |
| <hr/>                    |                                 |     |        |      |        |
| <b><i>D. loweii</i></b>  | TIR                             | 31  | 1.396  | 495  | 0.382  |
|                          | LTR                             | 74  | 6.883  | 1366 | 1.55   |
|                          | LINE                            | 34  | 3.839  | 933  | 0.799  |
|                          | RC                              | 5   | 1.245  | 813  | 0.363  |
|                          | Polinton                        | 1   | 0.054  | 7    | 0.013  |
|                          | Unknown                         | 9   | 0.641  | 265  | 0.087  |
|                          | Total *                         | 145 | 13.417 | 3614 | 3.1    |
|                          | Total<br>(including<br>Unknown) | 154 | 14.058 | 3879 | 3.187  |
| <hr/>                    |                                 |     |        |      |        |
| <b><i>D. affinis</i></b> | TIR                             | 9   | 0.872  | 278  | 0.177  |
|                          | LTR                             | 47  | 4.328  | 630  | 1.427  |
|                          | LINE                            | 13  | 5.223  | 530  | 0.406  |
|                          | RC                              | 4   | 1.351  | 369  | 0.245  |
|                          | Polinton                        | 1   | 0.068  | 35   | 0.041  |
|                          | Unknown                         | 10  | 1.192  | 206  | 0.098  |
|                          | Total *                         | 74  | 11.842 | 1842 | 2.29   |
|                          | Total<br>(including<br>Unknown) | 84  | 13.034 | 2048 | 2.394  |

585

586



587 **Figure 1: A.** Phylogeny of the *D. pseudoobscura* group and the estimated time of  
588 divergence between nodes. **B.** Number of TE families shared between species in the *D.*  
589 *pseudoobscura* group, including putative novel families.

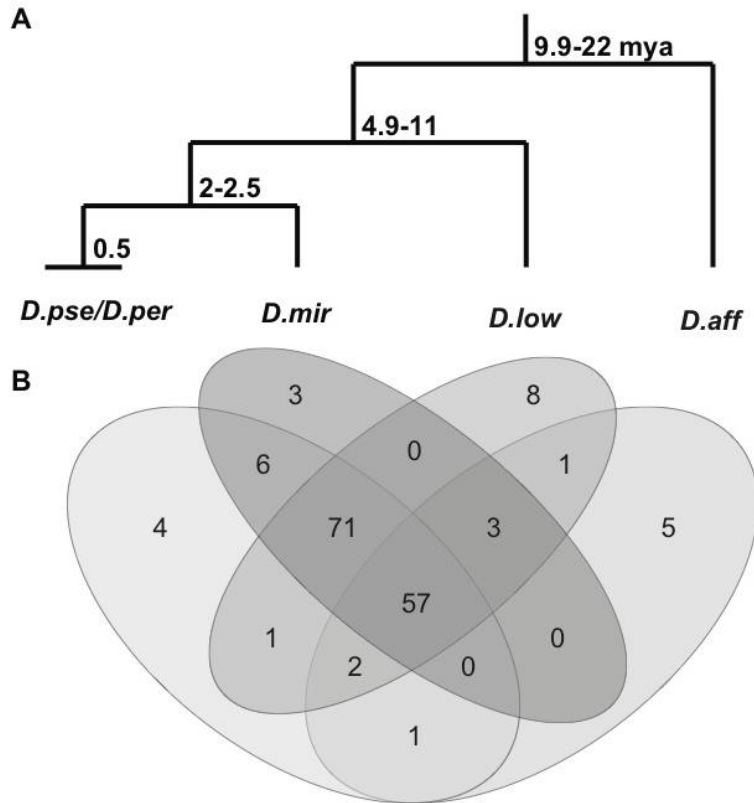

590

591

592 **Figure 2: A.** Each TE family and the proportion of times they show a lower divergence  
593 value than the mean divergence between the host species. **B.** Of the transferring TEs,  
594 the proportion of times these TEs are exchanging, grouped by TE order. **C.**  
595 Comparisons between the proportion of exchange events and the pairwise divergence  
596 between species, for exchanged TEs.

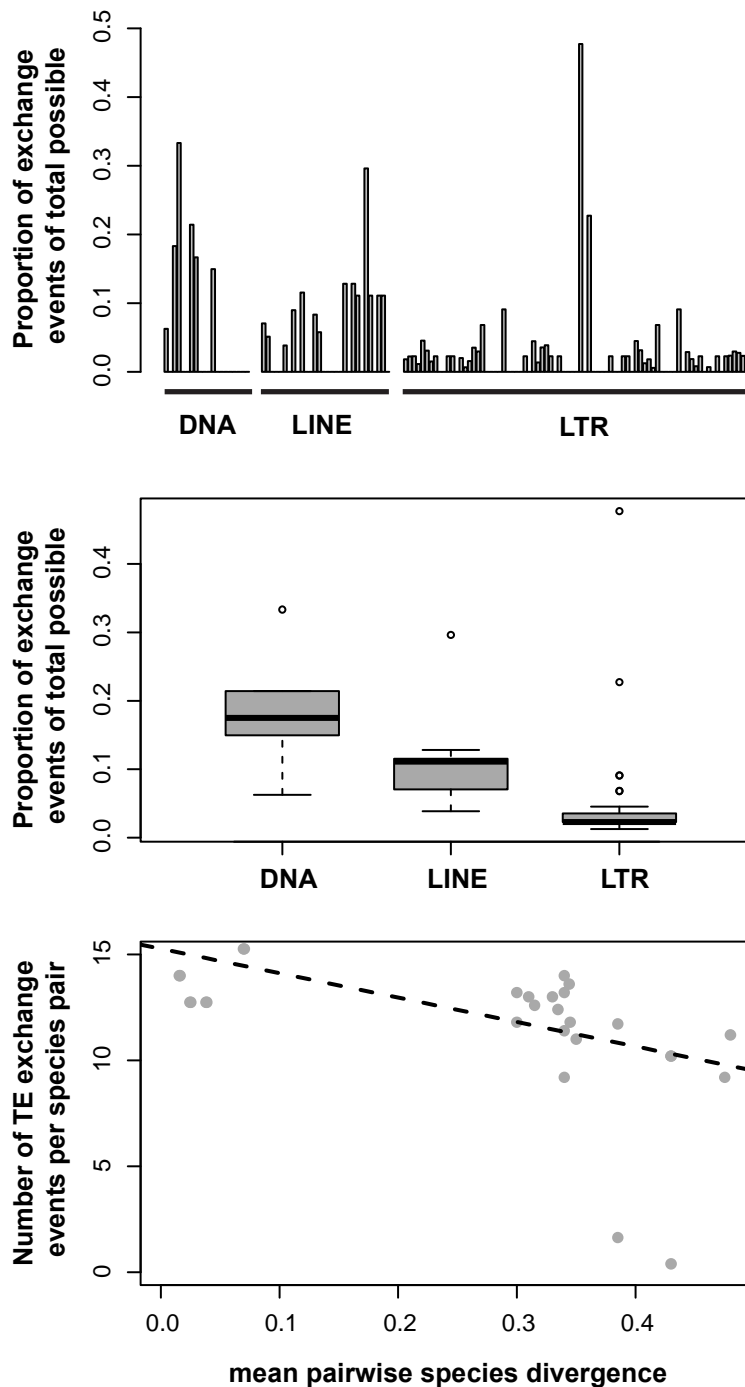

597

598 **Figure 3: A.** Pairwise comparison of silent site diversity ( $d_s$ ) for nuclear genes (solid  
599 line) and shared TEs (dashed lines) between *D. pseudoobscura*, *D. pseudoobscura*  
600 *bogotana*, *D. persimilis* and other species. The lower 2.5% quartile for nuclear  $d_s$  is  
601 shown as the dotted vertical line **B.** The number of transfer events for transposable  
602 elements based on  $d_s$ , the number in brackets shows events that can be seen in the  
603 assembled phylogenies. Note that many events could be occurring between species  
604 vertically as well as horizontally. **C.** Comparison of Tajimas D across species for  
605 frequently exchanged TEs and rarely exchanged TEs shows no difference, suggesting  
606 no population expansion. **D.** No more variation in copy number of rarely exchanged TEs  
607 than with frequently exchanged TEs. **E.** Proportion of shared nucleotide polymorphism  
608 sites between TE sequences in species, out of total nucleotide polymorphism sites,  
609 divided by TE families with low Ks relative to nuclear genes and TEs with higher  $d_s$ .

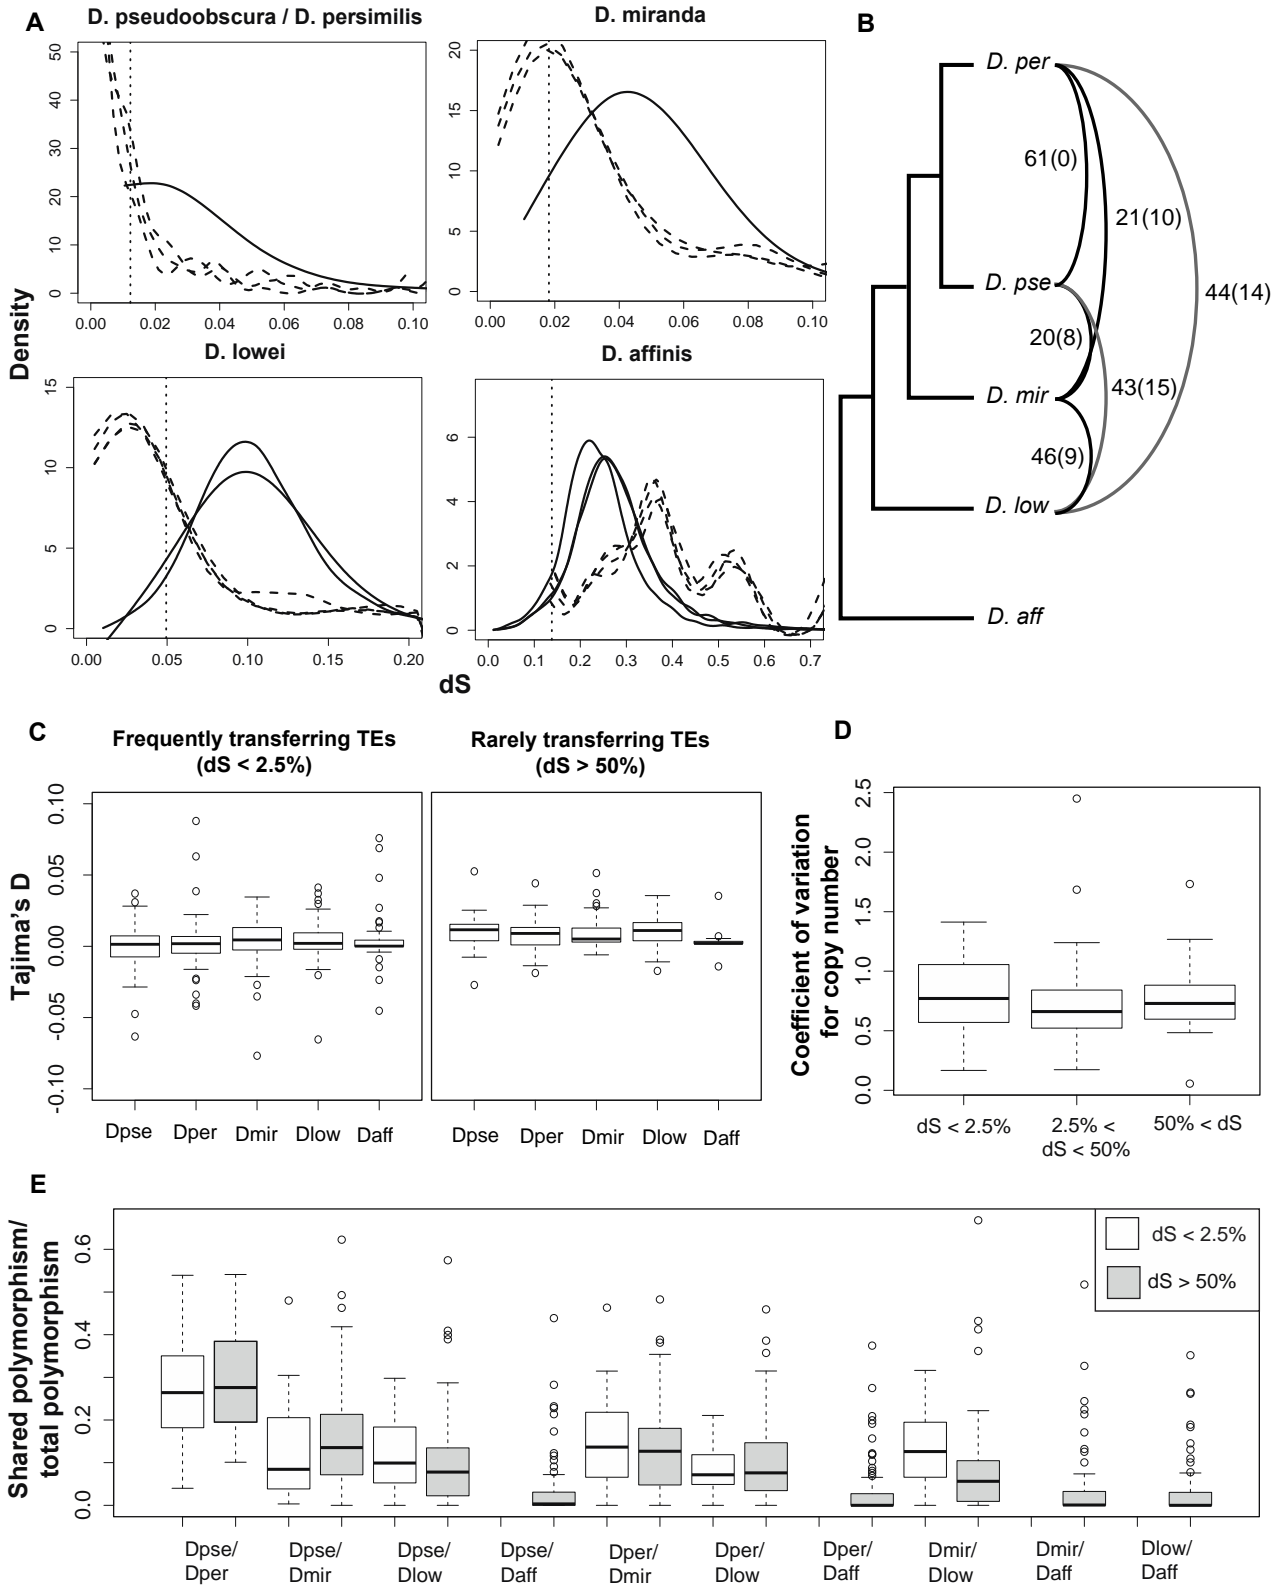

610

611

612 **Figure S1:** Pipeline for TE annotation.

613 **Figure S2:** TE density across the genomes of each species, found using

614 *PopoolationTE2*, sorted by TE order.

615 **Figure S3:** Comparison between putatively novel and known TE sequences for (A)

616 length, (B) expression, (C) small RNA silencing expression and (D-F) copy number.

617 **Figure S4:** Distribution of TE copy numbers per species.

618

619 **Table S1:** *D. pseudoobscura* lines used in this study

620 **Table S2:** TEs found in *D. obscura* group. Sorted by if they are previously discovered or

621 novel, then by Order and super family. Transmission states if the TE family is found to

622 transfer between species

623 **Table S3:** Diagonal shows the total number of families found in each species for

624 comparison.

625 **Table S4:** GLMs for three recombination maps versus TE accumulation, divided by

626 order and super family. Done for both TE count (quasipoisson GLM) and TE density

627 (binomial GLM). Significant values ( $p < 0.05$ ) are shown in bold.

628 **Table S5:** For instances where no dS for nuclear comparisons are available, we used

629 the dS between *D. pseudoobscura* and the species of interest.

630 **Table S6:** Number of unique and shared polymorphic sites for each species

631 comparison, for each TE family.

632 **Table S7:** *D. pseudoobscura* TEs and the patristic distance from other TEs in their

633 superfamily group, compared to the patristic distance between the TEs fly species and

634 *D.pseudoobscura*

## 635 **Bibliography**

636 Altschul S. F., Gish W., Miller W., Myers E. W., Lipman D. J., 1990 Basic local

637 alignment search tool. *J. Mol. Biol.* 215: 403–410.

638 Aravin A. A., Hannon G. J., Brennecke J., 2007 The piwi-piRNA pathway provides an

639 adaptive defense in the transposon arms race. *Science* (80-. ). 318: 761–764.

640 Avila V., Marion de Procé S., Campos J. L., Borthwick H., Charlesworth B., *et al.*, 2014

641 Faster-X effects in two *Drosophila* lineages. *Genome Biol. Evol.* 6: 2968–82.

642 Bartolomé C., Bello X., Maside X., 2009 Widespread evidence for horizontal transfer of

643 transposable elements across *Drosophila* genomes. *Genome Biol.* 10: R22.

- 644 Bosco G., Campbell P., Leiva-Neto J. T., Markow T. A., 2007 Analysis of *Drosophila*  
645 species genome size and satellite DNA content reveals significant differences  
646 among strains as well as between species. *Genetics* 177: 1277–1290.
- 647 Brennecke J., Malone C. D., Aravin A. A., Sachidanandam R., Stark A., *et al.*, 2008 An  
648 epigenetic role for maternally inherited piRNAs in transposon silencing. *Science*  
649 322: 1387–1392.
- 650 Burt A., Trivers R., 2006 *Genes in Conflict*.
- 651 Capy P., Koga A., David J. R., Hartl D. L., 1992 Sequence analysis of active Mariner  
652 elements in natural populations of *Drosophila simulans*. *Genetics* 130: 499–506.
- 653 Charlesworth B., Langley C. H., 1989 The population genetics of *Drosophila*  
654 transposable elements. *Annu. Rev. Genet.* 23: 251–87.
- 655 Charlesworth B., Langley C. H., Sniegowski P. D., 1997 Transposable element  
656 distributions in *Drosophila*. *Genetics* 147: 1993–5.
- 657 Chen Z., Sturgill D., Qu J., Jiang H., 2014 Comparative validation of the *D.*  
658 *melanogaster* modENCODE transcriptome annotation. *Genome ...*: 1209–1223.
- 659 Clark J. B., Kidwell M. G., 1997 A phylogenetic perspective on P transposable element  
660 evolution in *Drosophila*. *Proc Nat Acad Sci USA* 94: 11428–11433.
- 661 Clark A. G., Eisen M. B., Smith D. R., Bergman C. M., Oliver B., *et al.*, 2007 Evolution of  
662 genes and genomes on the *Drosophila* phylogeny. *Nature* 450: 203–218.
- 663 Daniels S. B., Peterson K. R., Strausbaugh L. D., Kidwell M. G., Chovnick A., 1990  
664 Evidence for horizontal transmission of the P transposable element between  
665 *Drosophila* species. *Genetics* 124: 339–355.
- 666 DePristo M. A., Banks E., Poplin R., Garimella K. V., Maguire J. R., *et al.*, 2011 A  
667 framework for variation discovery and genotyping using next-generation DNA  
668 sequencing data. *Nat. Genet.* 43: 491–8.
- 669 Dobzhansky T., 1935 The Y Chromosome of *Drosophila Pseudoobscura*. *Genetics* 20:  
670 366–76.
- 671 Dobzhansky T., 1937 Further data on the variation of the Y chromosome in *Drosophila*  
672 *pseudoobscura*. : 340–346.
- 673 Dobzhansky T., Sturtevant A. H., 1937 Inversions In Chromosomes of *Drosophila*  
674 *pseudoobscura*. *Genetics* 23: 28–64.
- 675 Duff M. O., Olson S., Wei X., Garrett S. C., Osman A., *et al.*, 2015 Genome-wide  
676 identification of zero nucleotide recursive splicing in *Drosophila*. *Nature* 521: 376–  
677 379.
- 678 Ellinghaus D., Kurtz S., Willhoeft U., 2008 LTRharvest, an efficient and flexible software  
679 for de novo detection of LTR retrotransposons. *BMC Bioinformatics* 9: 18.
- 680 Ellison C. E., Bachtrog D., 2013 Dosage Compensation via Transposable Element  
681 Mediated Rewiring of a Regulatory Network. *Science* (80-. ). 342: 846–850.
- 682 Fourmant M., Gibbs M. J., 2006 Patristic: a program for calculating patristic distances  
683 and graphically comparing the components of genetic change. *BMC Evol. Biol.* 6:  
684 1–5.
- 685 Francisco F. O., Lemos B., 2014 How Do Y-Chromosomes Modulate Genome-Wide  
686 Epigenetic States : Genome Folding , Chromatin Sinks , and Gene Expression. *J.*  
687 *Genomics* 2: 94–103.
- 688 Fuller Z. L., Haynes G. D., Richards S., Schaeffer S. W., 2016 Genomics of Natural  
689 Populations: How Differentially Expressed Genes Shape the Evolution of

- 690 Chromosomal Inversions in. Genetics.
- 691 Ghildyal M., Zamore P. D., 2009 Small silencing RNAs: an expanding universe. Nat Rev  
692 Genet. 10: 94–108.
- 693 González J., Lenkov K., Lipatov M., Macpherson J. M., Petrov D. a, 2008 High rate of  
694 recent transposable element-induced adaptation in *Drosophila melanogaster*. PLoS  
695 Biol. 6: e251.
- 696 Gregory T. R., 2005 Synergy between sequence and size in large-scale genomics. Nat.  
697 Rev. Genet. 6: 699–708.
- 698 Gregory T. R., Johnston J. S., 2008 Genome size diversity in the family Drosophilidae.  
699 Heredity (Edinb). 101: 228–38.
- 700 Guindon S., Dufayard J.-F., Lefort V., Anisimova M., Hordijk W., *et al.*, 2010 New  
701 algorithms and methods to estimate maximum-likelihood phylogenies: assessing  
702 the performance of PhyML 3.0. Syst. Biol. 59: 307–21.
- 703 Haas B. J., Papanicolaou A., Yassour M., Grabherr M., Blood P. D., *et al.*, 2013 De  
704 novo transcript sequence reconstruction from RNA-seq using the Trinity platform  
705 for reference generation and analysis. Nat. Protoc. 8: 1494–512.
- 706 Hartl D. L., Lozovskaya E. R., Nurminsky D. I., Lohe A. R., 1997 What restricts the  
707 activity of mariner-like transposable elements? Trends Genet. 13: 197–201.
- 708 Hellen E. H. B., Brookfield J. F. Y., 2013a The diversity of class II transposable  
709 elements in mammalian genomes has arisen from ancestral phylogenetic splits  
710 during ancient waves of proliferation through the genome. Mol. Biol. Evol. 30: 100–  
711 108.
- 712 Hellen E. H. B., Brookfield J. F. Y., 2013b Transposable element invasions. Mob.  
713 Genet. Elements 3: e23920.
- 714 Hill T., Schlötterer C., Betancourt A. J., 2016 Hybrid Dysgenesis in *Drosophila simulans*  
715 Associated with a Rapid Invasion of the P-Element. PLoS Genet. 12.
- 716 Hoen D. R., Hickey G., Bourque G., Casacuberta J., Cordaux R., *et al.*, 2015 A call for  
717 benchmarking transposable element annotation methods. Mob. DNA 6: 13.
- 718 Joshi N., Fass J., 2011 Sickle: A sliding window, adaptive, quality-based trimming tool  
719 for fastQ files. 1.33.
- 720 Kaplan N., Darden T., Langley C. H., 1985 Evolution and extinction of transposable  
721 elements in Mendelian populations. Genetics 109: 459–480.
- 722 Katoh K., Misawa K., Kuma K., Miyata T., 2002 MAFFT: a novel method for rapid  
723 multiple sequence alignment based on fast Fourier transform. Nucleic Acids Res.  
724 30: 3059–66.
- 725 Kofler R., Orozco-terWengel P., Maio N. de, Pandey R. V., Nolte V., *et al.*, 2011  
726 Popoolation: A toolbox for population genetic analysis of next generation  
727 sequencing data from pooled individuals. PLoS One 6.
- 728 Kofler R., Betancourt A. J., Schlötterer C., 2012 Sequencing of pooled DNA Samples (  
729 Pool-Seq) uncovers complex dynamics of transposable element insertions in  
730 *Drosophila melanogaster*. PloS Genet. 8: 1–16.
- 731 Kofler R., Hill T., Nolte V., Betancourt A. J., Schlötterer C., 2015a The recent invasion of  
732 natural *Drosophila simulans* populations by the P-element. Proc. Natl. Acad. Sci. U.  
733 S. A. 112.
- 734 Kofler R., Nolte V., Schlötterer C., 2015b Tempo and mode of transposable element  
735 activity in *Drosophila*. PLoS Genet 11: e1005406.



- 736 Kofler R., Daniel G., Schl C., 2016a PoPoolationTE2 : comparative population genomics  
737 of transposable elements using Pool-Seq. : 1–7.
- 738 Kofler R., Daniel G., Schlotterer C., 2016b PoPoolationTE2 : comparative population  
739 genomics of transposable elements using Pool-Seq. Mol. Biol. Evol.: 1–12.
- 740 Kohany O., Gentles A. J., Hankus L., Jurka J., 2006 Annotation, submission and  
741 screening of repetitive elements in Repbase: RepbaseSubmitter and Censor. BMC  
742 Bioinformatics 7: 474.
- 743 Kurtz S., 2010 The Vmatch large scale sequence analysis software Features of Vmatch.  
744 : 1–12.
- 745 Lerat E., Burlet N., Biéumont C., Vieira C., 2011 Comparative analysis of transposable  
746 elements in the *melanogaster* subgroup sequenced genomes. Gene 473: 100–9.
- 747 Leslie L. K., Cohen J. T., Newburger J. W., Alexander M. E., Wong J. B., *et al.*, 2010  
748 Evolutionary flux of canonical microRNAs and mirtrons in *Drosophila*. Nat. Genet.  
749 42: 6–10.
- 750 Levine M. T., Malik H. S., 2011 Learning to protect your genome on the fly. Cell 147:  
751 1440–1441.
- 752 Li H., Durbin R., 2009 Fast and accurate short read alignment with Burrows-Wheeler  
753 transform. Bioinformatics 25: 1754–60.
- 754 Lohe A. R., Moriyama E. N., Lidholm D. A., Hartl D. L., 1995 Horizontal transmission,  
755 vertical inactivation, and stochastic loss of mariner-like transposable elements. Mol.  
756 Biol. Evol. 12: 62–72.
- 757 Machado C. a, Haselkorn T. S., Noor M. a F., 2007 Evaluation of the genomic extent of  
758 effects of fixed inversion differences on intraspecific variation and interspecific gene  
759 flow in *Drosophila pseudoobscura* and *Drosophila persimilis*. Genetics 175: 1289–  
760 306.
- 761 Maruyama K., Hartl D. L., 1991 Evolution of the transposable element Mariner in  
762 *Drosophila* Species. Genet. Soc. Am. 128: 319–329.
- 763 Noor M. a F., Garfield D. a, Schaeffer S. W., Machado C. a, 2007 Divergence between  
764 the *Drosophila pseudoobscura* and *D. persimilis* genome sequences in relation to  
765 chromosomal inversions. Genetics 177: 1417–28.
- 766 Obbard D. J., Gordon K. H. J., Buck A. H., Jiggins F. M., 2009 The evolution of RNAi as  
767 a defence against viruses and transposable elements. Philos. Trans. R. Soc. Lond.  
768 B. Biol. Sci. 364: 99–115.
- 769 Palmieri N., Kosiol C., Schlotterer C., 2014 The life cycle of *Drosophila* orphan genes.  
770 Elife 3: 1–21.
- 771 Peccoud J., Loiseau V., Cordaux R., Gilbert C., 2017 Massive horizontal transfer of  
772 transposable elements in insects. Proc. Natl. Acad. Sci. 114: 4721–4726.
- 773 Petrov D. a, Fiston-Lavier A.-S., Lipatov M., Lenkov K., González J., 2011 Population  
774 genomics of transposable elements in *Drosophila melanogaster*. Mol. Biol. Evol.  
775 28: 1633–1644.
- 776 Price A. L., Jones N. C., Pevzner P. a., 2005 De novo identification of repeat families in  
777 large genomes. Bioinformatics 21: 351–358.
- 778 Quinlan A. R., Hall I. M., 2010 BEDTools: a flexible suite of utilities for comparing  
779 genomic features. Bioinformatics 26: 841–2.
- 780 Rahman R., Chirn G.-W., Kanodia A., Sytnikova Y. A., Brembs B., *et al.*, 2015 Unique  
781 transposon landscapes are pervasive across *Drosophila melanogaster* genomes.

- 782 Nucleic Acids Res. 43: 10655–72.
- 783 Richards S., Liu Y., Bettencourt B. R., Hradecky P., Letovsky S., *et al.*, 2005
- 784 Comparative genome sequencing of *Drosophila pseudoobscura*: chromosomal,
- 785 gene, and cis-element evolution. *Genome Res.* 15: 1–18.
- 786 Rius N., Guillén Y., Delprat A., Kapusta A., Feschotte C., *et al.*, 2016 Exploration of the
- 787 *Drosophila buzzatii* transposable element content suggests underestimation of
- 788 repeats in *Drosophila* genomes. *BMC Genomics* 17: 344.
- 789 Sackton T. B., Hartl D. L., 2013 Meta-Analysis Reveals that Genes Regulated by the
- 790 Preferentially Localized to Repressive Chromatin. *Genome Biol. Evol.* 5: 255–266.
- 791 Sánchez-Gracia A., Maside X., Charlesworth B., 2005 High rate of horizontal transfer of
- 792 transposable elements in *Drosophila*. *Trends Genet.* 21: 200–203.
- 793 Schneider T. D., Stephens R. M., 1990 Sequence logos: a new way to display
- 794 consensus sequences. *Nucleic Acids Res.* 18: 6097–6100.
- 795 Sessegolo C., Burlet N., Haudry A., Biémont C., Vieira C., *et al.*, 2016 Strong
- 796 phylogenetic inertia on genome size and transposable element content among 26
- 797 species of flies. *Biol. Lett.* 12: 521–524.
- 798 Smit A. F. A., Hubley R., 2008 RepeatModeler Open-1.0.
- 799 Sniegowski P. D., Charlesworth B., 1994 Transposable element numbers in
- 800 cosmopolitan inversions from a natural population of *Drosophila melanogaster*.
- 801 *Genetics* 137: 815–827.
- 802 Tajima F., 1989 Statistical method for testing the neutral mutation hypothesis by DNA
- 803 polymorphism. *Genetics* 123: 585–595.
- 804 Tarailo-Graovac M., Chen N., 2009 Using RepeatMasker to identify repetitive elements
- 805 in genomic sequences. *Curr. Protoc. Bioinforma.*
- 806 Vieira C., Lepetit D., Dumont S., Biémont C., 1999 Wake up of transposable elements
- 807 following *Drosophila simulans* worldwide colonization. *Mol. Biol. Evol.* 16: 1251–5.
- 808 Yang Z., 2007 PAML 4: Phylogenetic analysis by maximum likelihood. *Mol. Biol. Evol.*
- 809 24: 1586–1591.
- 810

**Figure S1:** Pipeline for TE annotation.

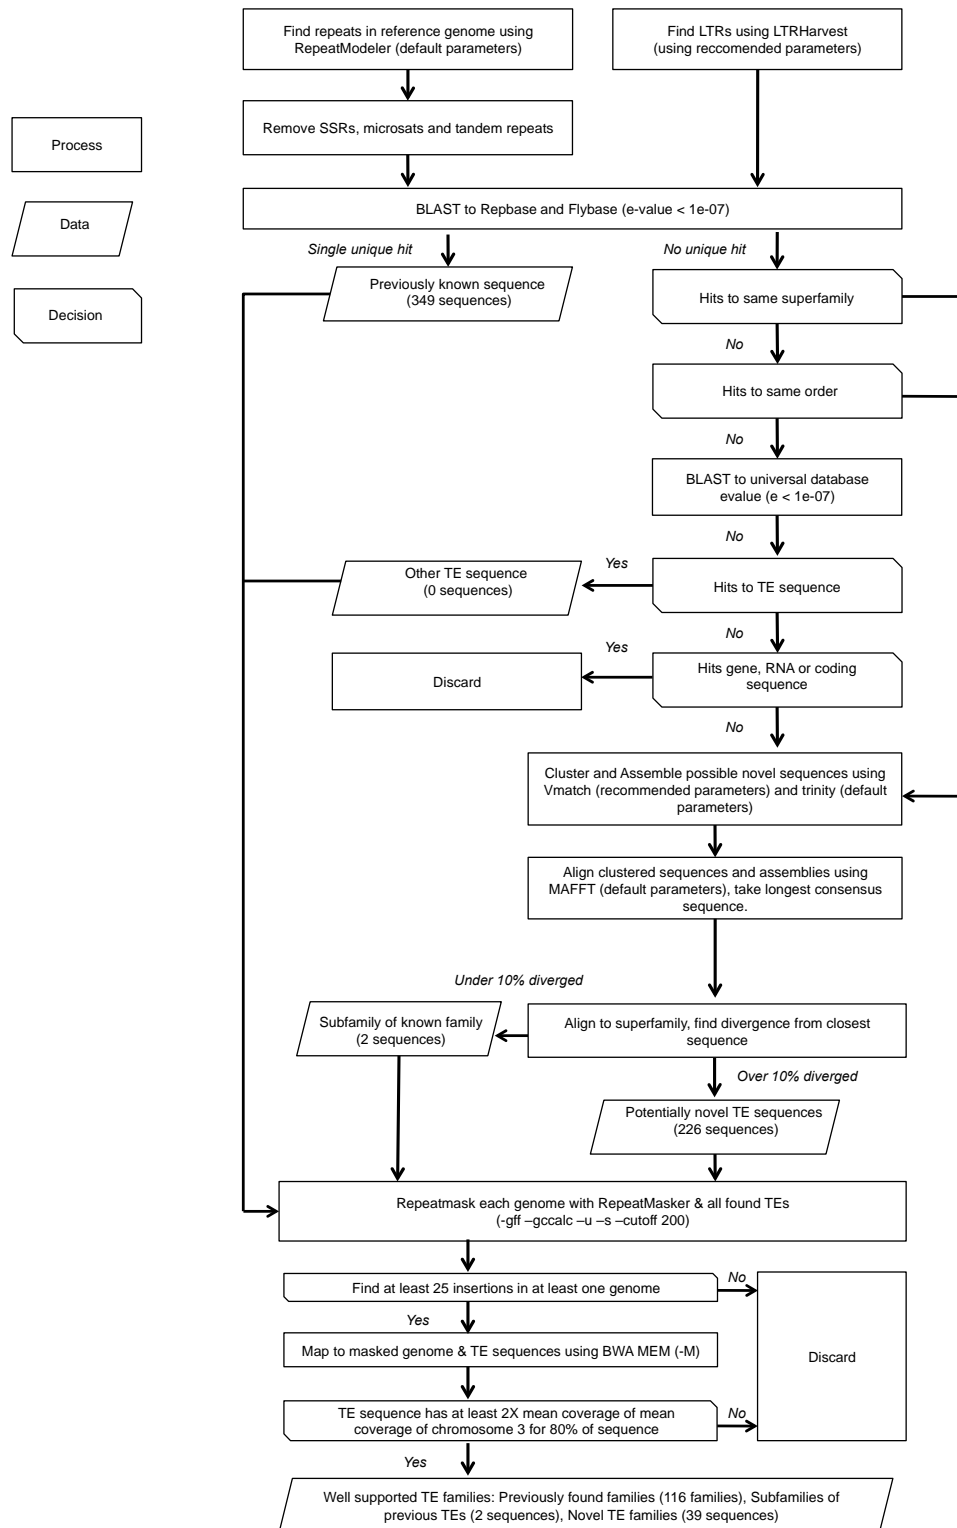

**Figure S2:** TE density across the genomes of each species, found using *PopoolationTE2*, sorted by TE order.

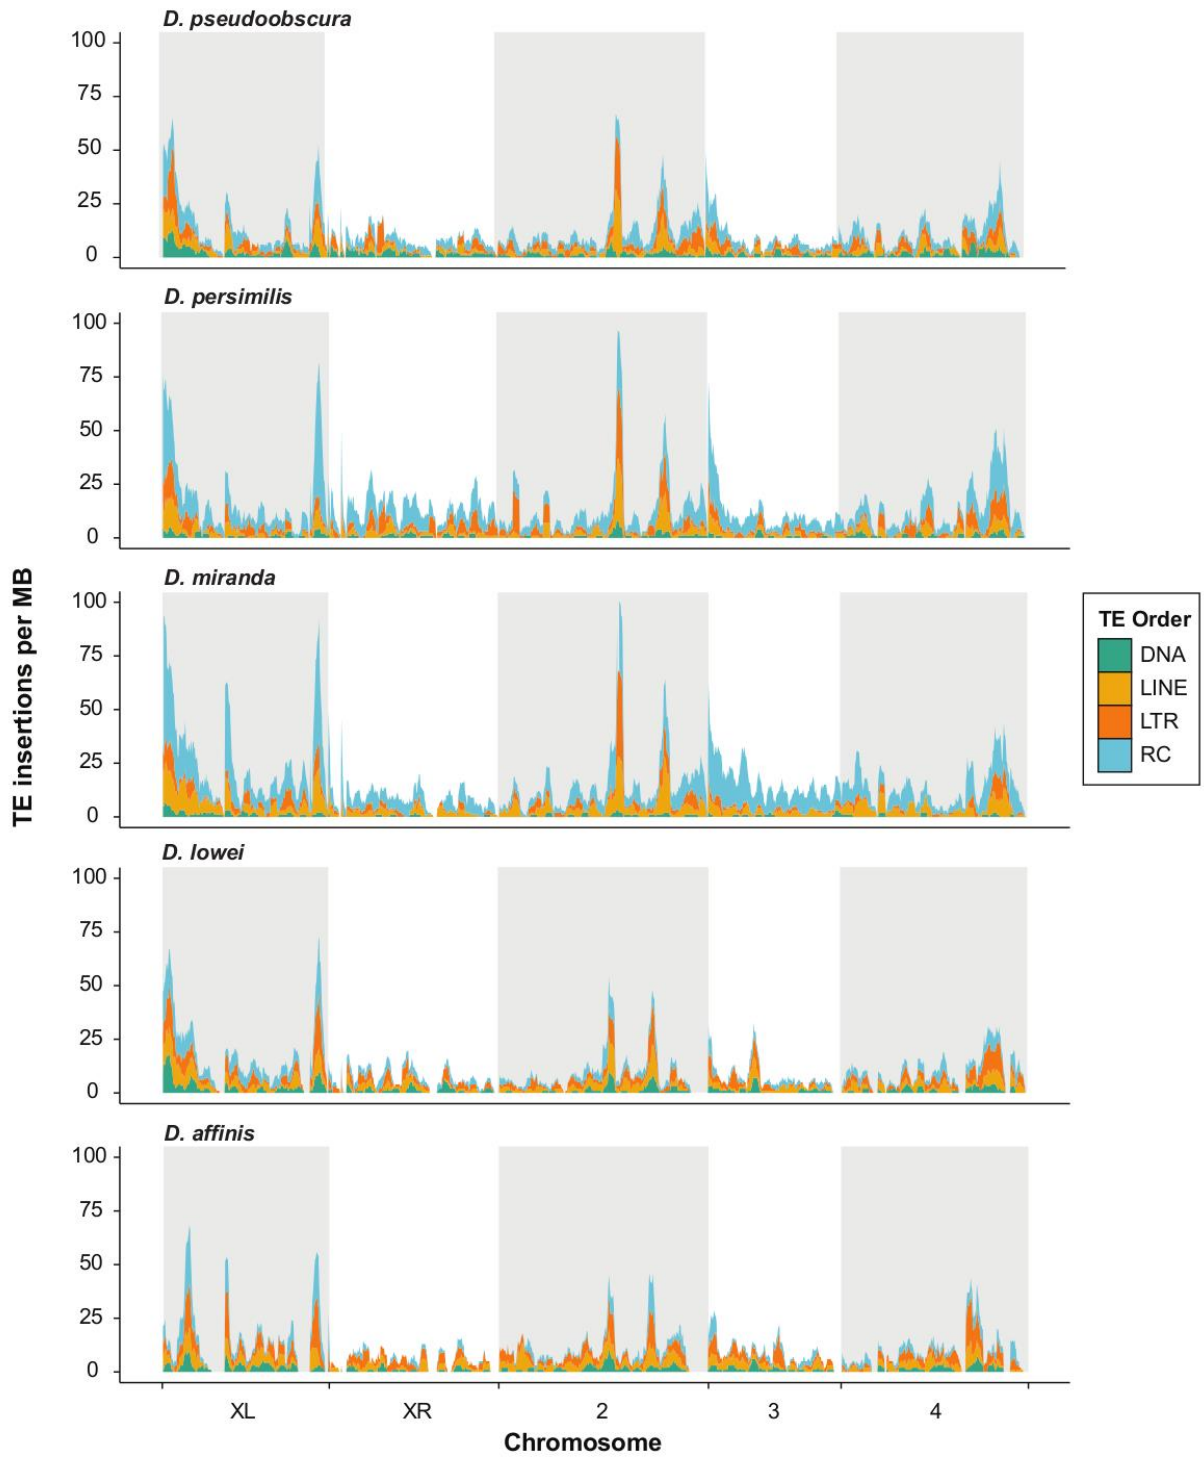

**Figure S3:** Comparison between putatively novel (grey) and known TE sequences (white) for (A) length, (B) expression, (C) small RNA silencing expression and (D-F) copy number.

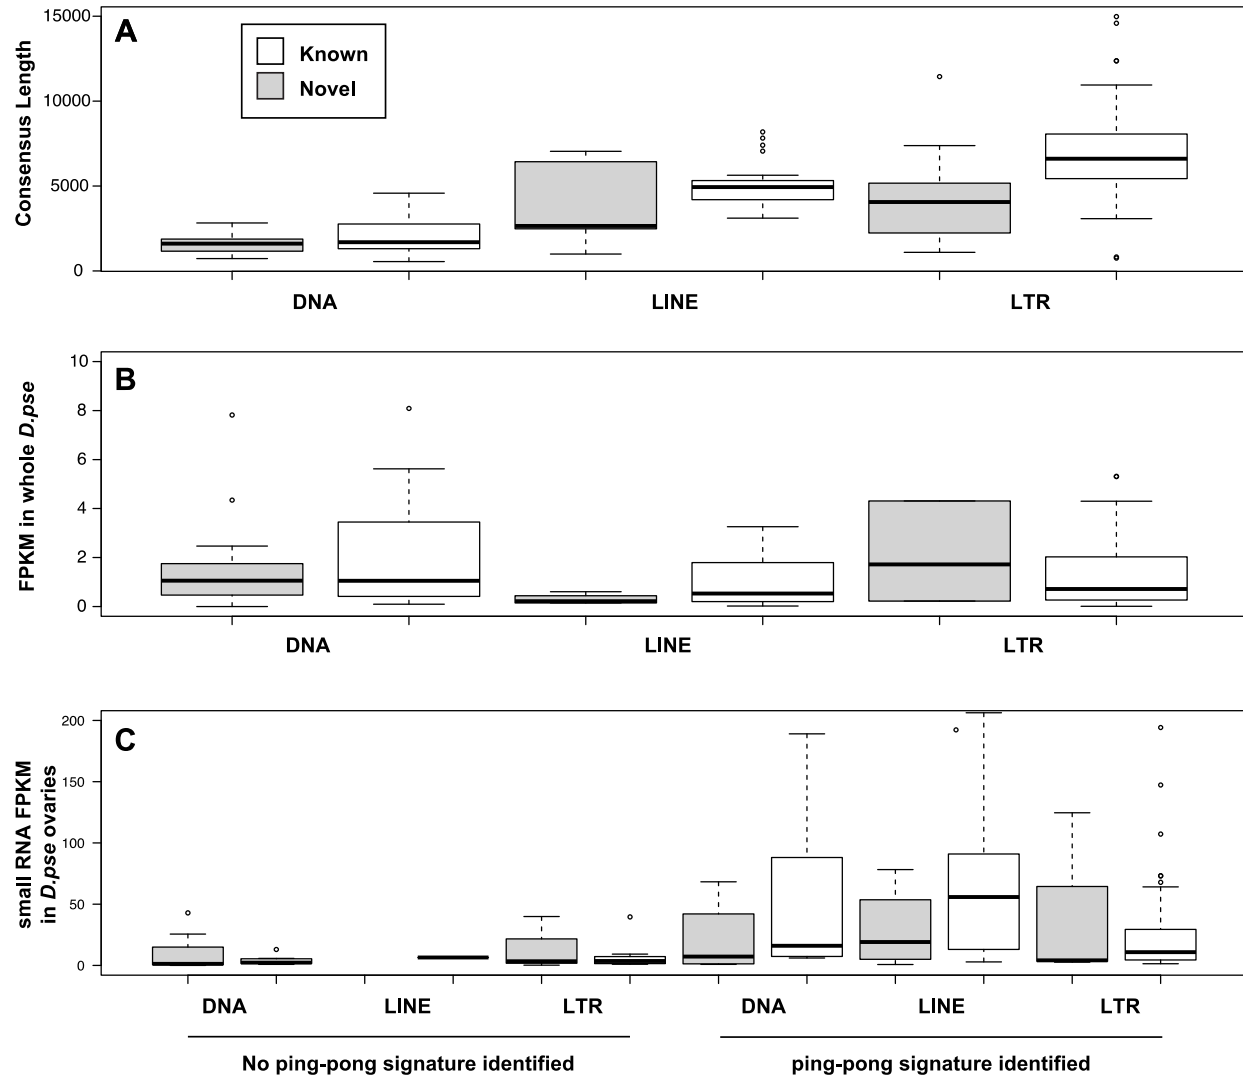

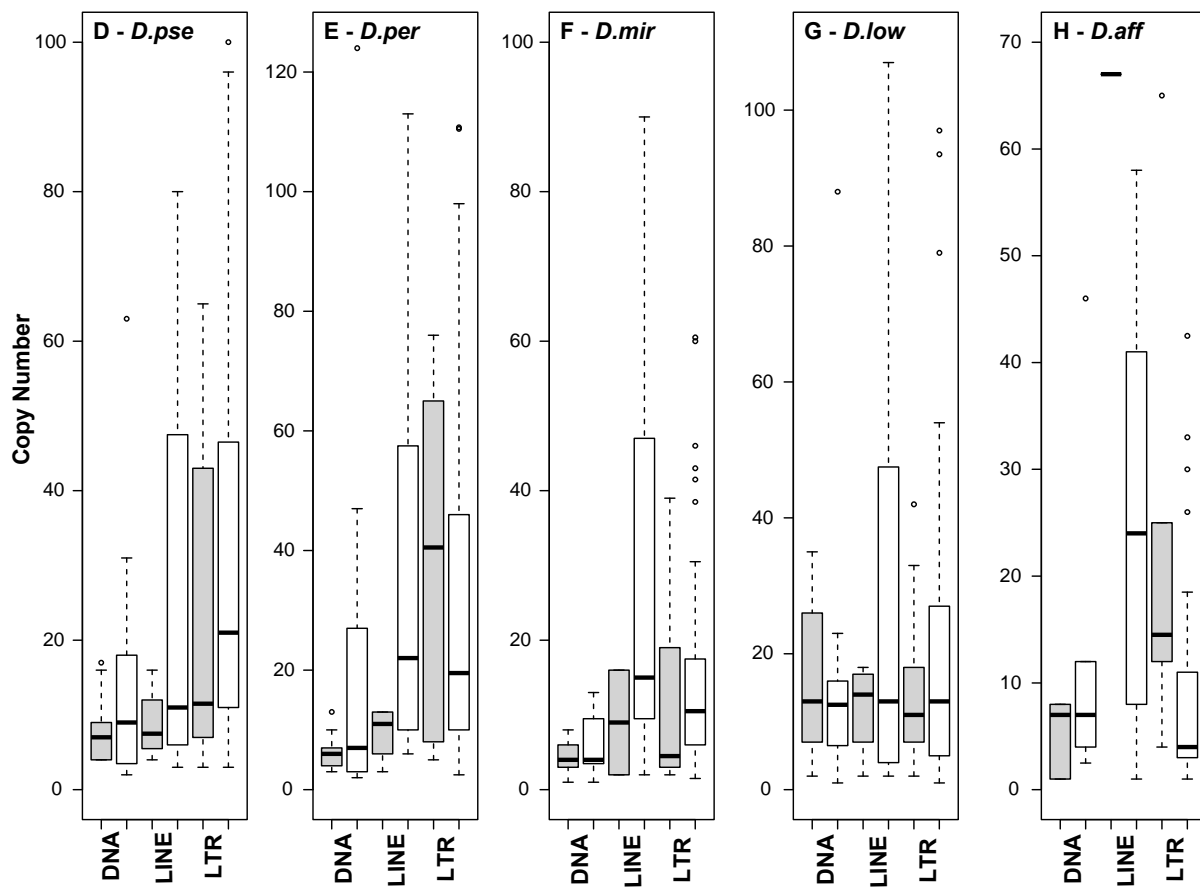

**Figure S4: Distribution of TE copy numbers per species.**

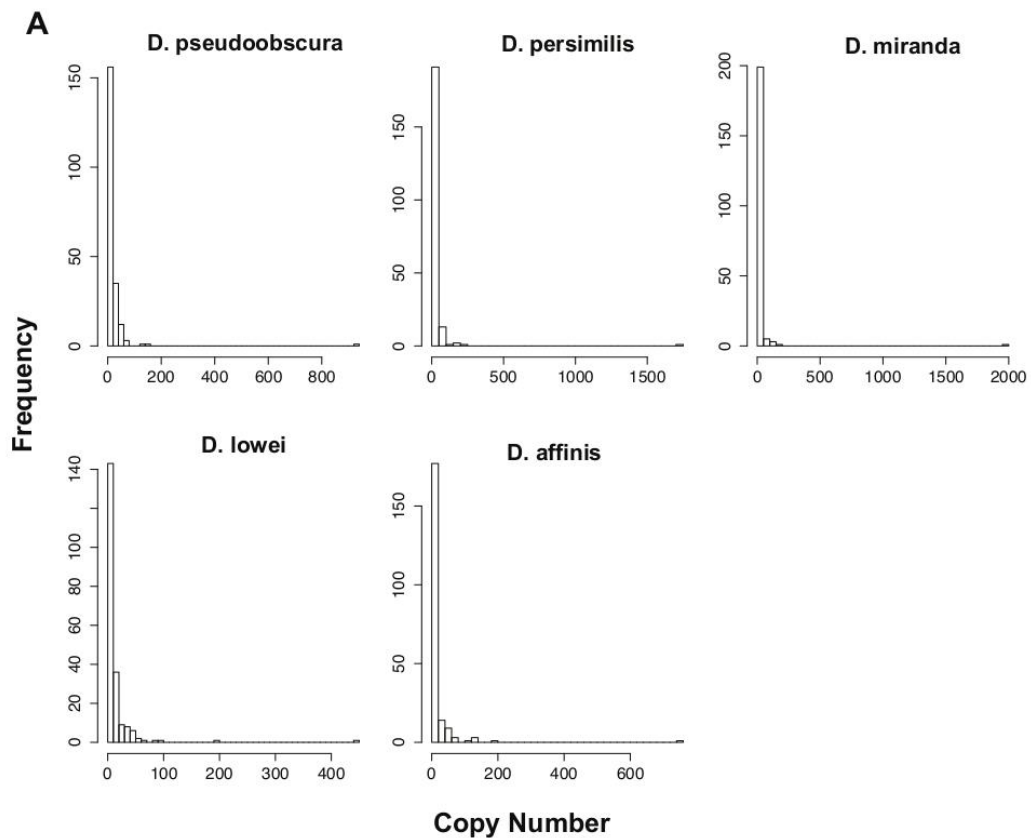

Source: https://www.biorxiv.org/content/early/2018/03/18/284117.full.pdf
